# Supplementary material for: Chitin Increases Mycobacterium ulcerans Growth in Acidic Environments
Source: PubMed Central journal article supplement (PMC6031397; doi:10.1264/jsme2.me17160), 2018-06-16

### Supplementary Material SM1-to-SM3

SM1 . Distributions in the *pH*-values among aquatic environments. Distributions are given for three BU endemic areas: (A) Akonolinga, Cameroon; (B) Bankim, Cameroon and (C) French Guiana. (From the data published in Garchitorea *et al.* 2015a and Morris *et al.* 2014, 2016). Dotted lines delineate the range of *pH* values used in our experiments. The black arrow indicates the *pH* value of control medium 7H9.

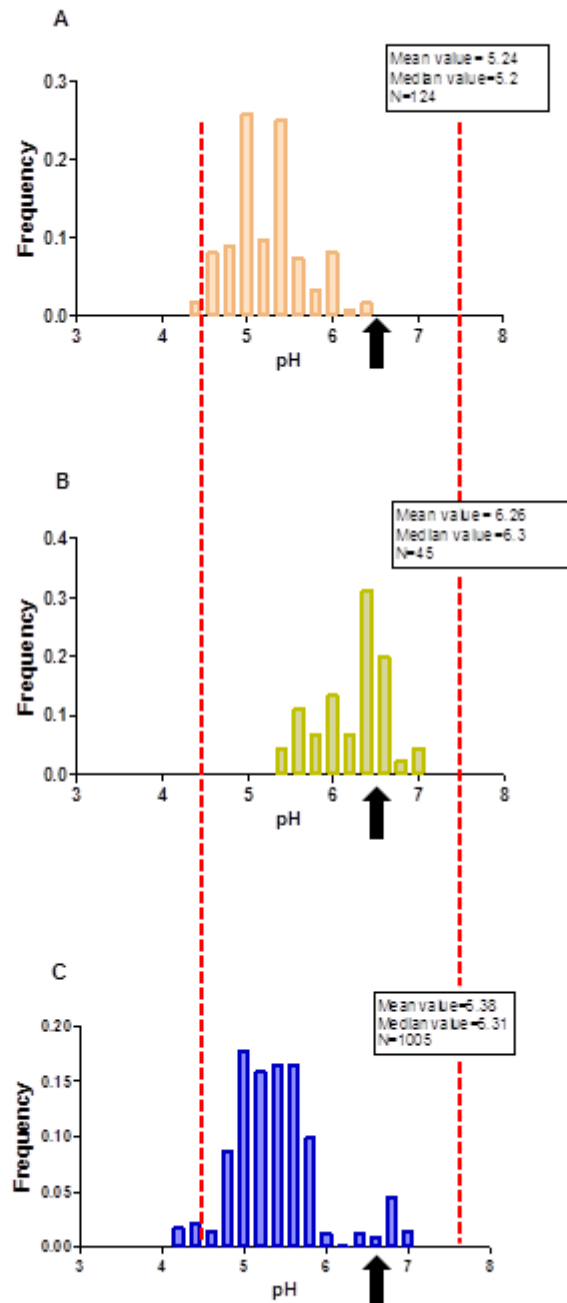

**SM 2. Statistics driven from the maximal (A) and minimal (B) linear mixed models used to fit the number of *Mycobacterium ulcerans* cells.** Models are transcribed in R language. In both cases, samples were declared as explanatory variables with random effects. Statistics in bold characters are those that are significant at 5% C.I.

---

**(A) Maximal model:**

lme (number of bacteria ~  $pH \times Chitin \times Time + pH \times Chitin + pH \times Time + Chitin \times Time + Chitin + Time + pH$  ,  
 random=~1 | Sample,data=data,method="ML")

---

| Explanatory variable   | F- value | p-value          |
|------------------------|----------|------------------|
| Time                   | 13.077   | <b>&lt;0.001</b> |
| <i>pH</i>              | 1.632    | 0.161            |
| Chitin                 | 4.305    | <b>0.046</b>     |
| <i>pH</i> ×Chitin      | 1.980    | 0.088            |
| <i>pH</i> ×Time        | 1.820    | <b>0.026</b>     |
| Chitin×Time            | 9.724    | <b>&lt;0.001</b> |
| <i>pH</i> ×Chitin×Time | 0.899    | 0.593            |

---

**(B) Minimal model:**

lme(Numberbacteria~  $pH \times Chitin + pH \times Time + Chitin \times Time + Chitin + Time +$   
 $pH$  ,random=~1 | Sample,data=data,method="ML")

---

| Explanatory variable | F- value | p-value          |
|----------------------|----------|------------------|
| Time                 | 13.261   | <b>&lt;0.001</b> |
| <i>pH</i>            | 1.610    | 0.167            |
| Chitin               | 4.679    | <b>0.038</b>     |
| <i>pH</i> ×Chitin    | 2.008    | 0.084            |
| <i>pH</i> ×Time      | 1.845    | <b>0.021</b>     |
| Chitin×Time          | 9.861    | <b>&lt;0.001</b> |

---

**SM 3. Changes in the number of *Mycobacterium ulcerans* cells within three pH groups.** The three pH groups are defined as follows: pH low (4.5, 5.0, 5.5); pH middle (6.0, 6.5) and pH high (7.0, 7.5). Each color line represents a different time (t = 0, 25, 35 and 50).

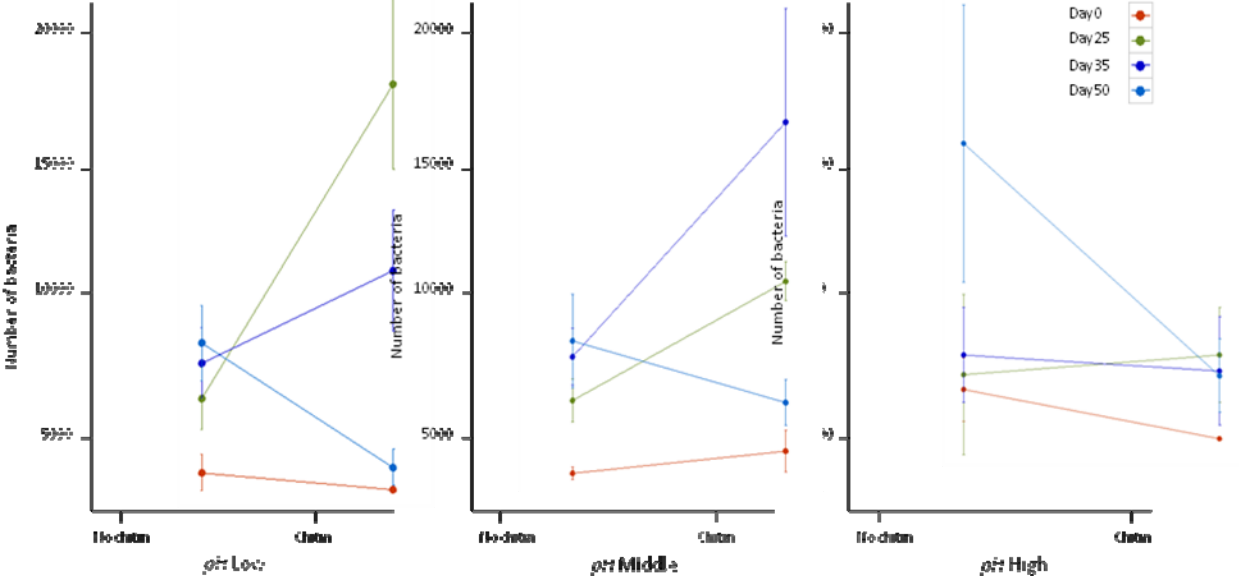

Supplement: 33_234_s1.pdf [file 33_234_s1.pdf]
